# Supplementary material
Source: Springer Nature journal article supplement (https://www.springermedizin.de/resource/supplementary/12905_2010_219_MOESM1_ESM.pdf/9518328)

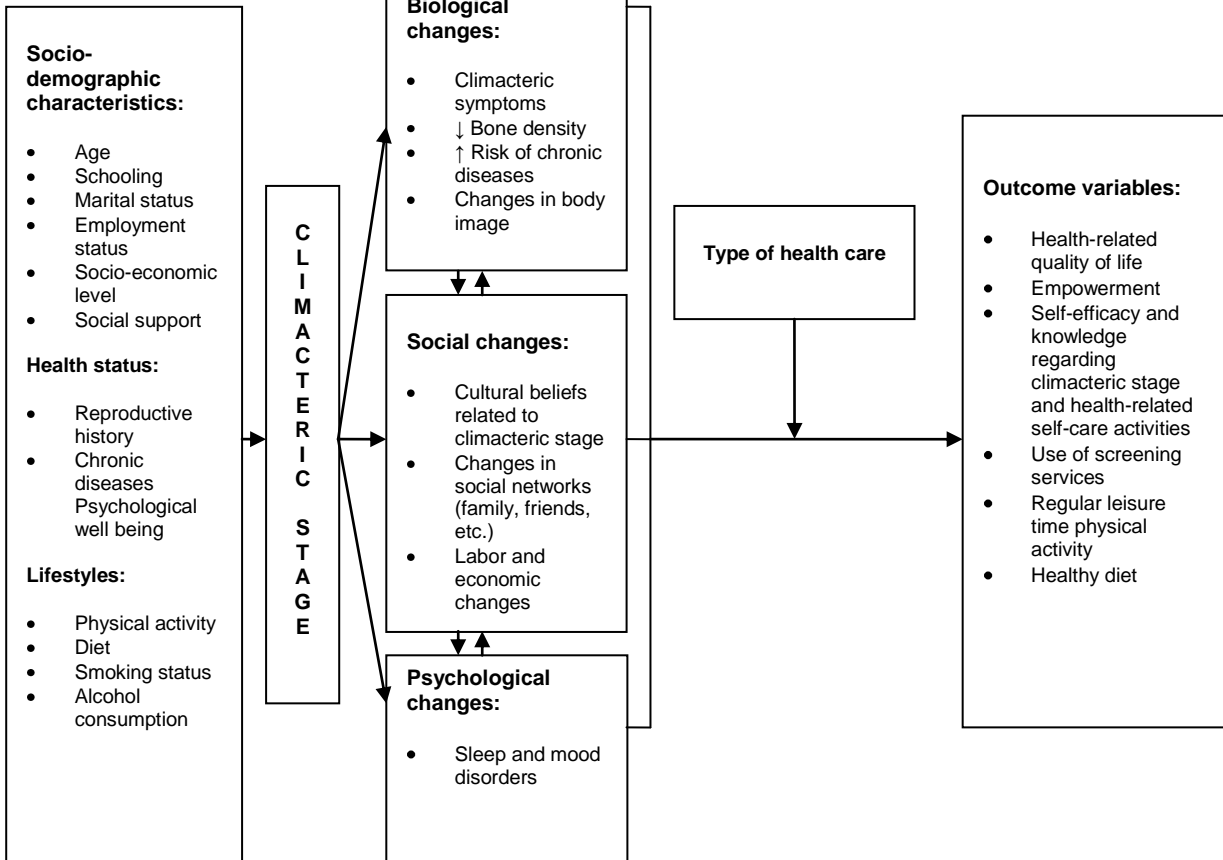

Supplement: MOESM1 [file 9518328]
